# Supplementary material for: Multi-omics analyses reveal ClpP activators disrupt essential mitochondrial pathways in triple-negative breast cancer
Source: Front Pharmacol. 2023 Mar 31;14:1136317. doi: 10.3389/fphar.2023.1136317 (PMC10103842; doi:10.3389/fphar.2023.1136317)
Supplement: Supplementary file 2 [file DataSheet7.xlsx]

## Sheet: WT ONC201 vs. DMSO
Enrichment analysis report
Enrichment by Metabolic Networks (Endogenous)					WT_ONC201_GeneGo.22Dec2022				PR_ClpP_WT_ONC201_Refined_pValue				TR_ClpP_WT_ONC201_Refined_pValue
#	Networks	Total	min(pValue)	Min FDR	p-value	FDR	In Data	Network Objects from Active Data	p-value	FDR	In Data	Network Objects from Active Data	p-value	FDR	In Data	Network Objects from Active Data		Total hits
1	Aminoacid metabolism_Ala,Ser,Cys,Met,His,Pro,Gly,Glu,Gln metabolism and transport	190	5.924e-06	0.0001481	5.924e-06	0.0001481	13	2-Oxoglutaric acid cytoplasm, L-Proline extracellular region, L-Proline cytoplasm, S-Adenosyl-L-methionine cytoplasm, gamma-L-Glutamyl-L-cysteine intracellular anatomical structure, N-Methyl-glycine intracellular anatomical structure, L-Glutamic acid cytoplasm, Glutathione intracellular anatomical structure, L-Serine cytoplasm, L-Histidine cytoplasm, L-Serine extracellular region, Glutathione ext…	0.923	0.923	1	CTH	0.07717	0.4079	12	CBS, GCL cat, GLSK, SHMT1, ASCT2 (SLC1A5), PYCS, P5CR1, GLSL, GlyT1, MAT2A, SLC38A1, SHMT2		26
2	Lipid metabolism_Glycosphingolipid metabolism	190	5.924e-06	0.0001481	5.924e-06	0.0001481	13	2-Oxoglutaric acid cytoplasm, L-Proline extracellular region, L-Proline cytoplasm, S-Adenosyl-L-methionine cytoplasm, gamma-L-Glutamyl-L-cysteine intracellular anatomical structure, N-Methyl-glycine intracellular anatomical structure, L-Glutamic acid cytoplasm, Glutathione intracellular anatomical structure, L-Serine cytoplasm, L-Histidine cytoplasm, L-Serine extracellular region, Glutathione ext…	0.923	0.923	1	CTH	0.07717	0.4079	12	CBS, GCL cat, GLSK, SHMT1, ASCT2 (SLC1A5), PYCS, P5CR1, GLSL, GlyT1, MAT2A, SLC38A1, SHMT2		26
3	Glutamic acid pathway	103	2.724e-05	0.0005108	2.724e-05	0.0005108	9	2-Oxoglutaric acid cytoplasm, L-Glutamic acid cytoplasmic vesicle, L-Tryptophan extracellular region, gamma-L-Glutamyl-L-cysteine intracellular anatomical structure, L-Glutamic acid extracellular region, L-Glutamic acid cytoplasm, L-Tryptophan intracellular anatomical structure, L-Glutamic acid mitochondrial matrix, L-Glutamic acid cytosol	0.7476	0.8582	1	PSAT	0.5972	0.8797	4	GCL cat, GCL reg, PSAT, PYCS		14
4	Steroid metabolism_Cholesterol biosynthesis	88	3.836e-05	0.0008516	0.7552	0.9069	1	7-Dehydrocholesterol intracellular anatomical structure	0.1081	0.6342	3	FDFT1, HMGCS1, IDI1	3.836e-05	0.0008516	13	CYP51A1, SC5D, SC4MOL, HMGCS2, HMGCS1, MVD, FDPS, EBP, LSS, MVK, DHCR7, HMDH, IDI1		17
5	Aminoacid metabolism_Asparagine, Aspartic acid metabolism and transport	112	5.326e-05	0.0007989	5.326e-05	0.0007989	9	Adenylo-succinate intracellular anatomical structure, L-Glutamic acid extracellular region, L-Glutamic acid cytoplasm, N-Carbamoylaspartate intracellular anatomical structure, L-Glutamic acid mitochondrial matrix, L-Aspartic acid cytoplasm, Spermidine intracellular anatomical structure, L-Glutamic acid cytosol, L-Aspartic acid extracellular region	0.4353	0.8582	2	DPYD, ASNS	0.6633	0.8909	4	ASNS, ASSY, ASCT2 (SLC1A5), CSAD		15
6	Aminoacid metabolism_Alanine,Glycine,Cysteine metabolism and transport	115	6.564e-05	0.0008205	6.564e-05	0.0008205	9	2-Oxoglutaric acid cytoplasm, S-Adenosyl-L-methionine cytoplasm, gamma-L-Glutamyl-L-cysteine intracellular anatomical structure, N-Methyl-glycine intracellular anatomical structure, Choline phosphate intracellular anatomical structure, Choline cytoplasm, L-Glutamic acid cytoplasm, Glutathione intracellular anatomical structure, S-Adenosyl-L-homocysteine cytoplasm	0.01684	0.6114	5	SERA, KBL, CTH, SERB, PSAT	0.08858	0.4097	8	CBS, SERA, SHMT1, ASCT2 (SLC1A5), PSAT, GlyT1, MAT2A, SHMT2		22
7	(L)-proline pathways and transport	118	8.037e-05	0.0008611	8.037e-05	0.0008611	9	L-Proline extracellular region, L-Proline cytoplasm, L-Lysine extracellular region, L-Proline cytosol, L-Tryptophan extracellular region, L-Glutamic acid cytoplasm, L-Tryptophan intracellular anatomical structure, AMP cytoplasm, L-Lysine cytosol	0.4621	0.8582	2	ARG2, TST	0.3342	0.6768	6	PLC-beta, P5CR2, CAT-2, ASCT2 (SLC1A5), P5CR1, CAT-3		17
8	Aminoacid metabolism_Asparagine, Aspartic acid, Arginine metabolism and transport	76	0.0001629	0.001358	0.0001629	0.001358	7	2-Oxoglutaric acid cytoplasm, Adenylo-succinate intracellular anatomical structure, L-Glutamic acid cytoplasm, N-Carbamoylaspartate intracellular anatomical structure, L-Aspartic acid cytoplasm, 2-Oxoglutaric acid mitochondrial matrix, L-Aspartic acid extracellular region	0.6368	0.8582	1	ASNS	0.1872	0.5455	5	ASNS, ASSY, CAT-2, ASCT2 (SLC1A5), CAT-3		13
9	Aminoacid metabolism_Arginine metabolism and transport	110	0.0002865	0.002149	0.0002865	0.002149	8	2-Oxoglutaric acid cytoplasm, L-Aspartic acid cytosol, L-Glutamic acid cytoplasm, L-Glutamic acid mitochondrial matrix, L-Aspartic acid cytoplasm, 2-Oxoglutaric acid mitochondrial matrix, Spermidine intracellular anatomical structure, L-Aspartic acid extracellular region	0.4262	0.8582	2	ARG2, ASNS	0.1504	0.5	7	GAMT, ADC, ASNS, ASSY, CAT-2, CSAD, CAT-3		17
10	L-serine pathways and transport	134	0.0008326	0.01241	0.05846	0.1686	5	L-Tryptophan extracellular region, L-Tryptophan intracellular anatomical structure, L-Serine cytoplasm, L-Serine extracellular region, L-Aspartic acid extracellular region	0.2572	0.8024	3	c-Myc, SERB, SerRS	0.0008326	0.01241	14	SGK1, SHMT, CBS, c-Myc, PTSS1, SHMT1, CAT-2, ASCT2 (SLC1A5), SerRS, GlyT1, SPT1, SLC38A1, SHMT2, CAT-3		22
11	Carbohydrate metabolism_TCA and tricarboxylic acid transport	101	0.000938	0.006395	0.000938	0.006395	7	2-Oxoglutaric acid cytoplasm, Citric acid extracellular region, Citric acid mitochondrial matrix, cis-Aconitic acid intracellular anatomical structure, Citric acid cytosol, 2-Oxoglutaric acid cytosol, 2-Oxoglutaric acid mitochondrial matrix	0.7407	0.8582	1	ACON	0.1087	0.4642	7	SDHA, IDH1, ODO1, SLC25A21, DLDH, PPCKM, SLC25A1		15
12	Tyrosine pathway	90	0.002688	0.01551	0.002688	0.01551	6	L-Tryptophan extracellular region, L-Glutamic acid cytoplasm, L-Tryptophan intracellular anatomical structure, L-Phenylalanine cytoplasm, L-Aspartic acid cytoplasm, AMP cytoplasm	0.3319	0.8417	2	TyrRS, SERB	0.7065	0.8911	3	Casein kinase II, alpha chains, SGK1, ASCT2 (SLC1A5)		11
13	L-ornithine pathways and transport	126	0.003371	0.01806	0.003371	0.01806	7	2-Oxoglutaric acid cytoplasm, L-Aspartic acid cytosol, L-Glutamic acid extracellular region, L-Glutamic acid cytoplasm, 2-Oxoglutaric acid mitochondrial matrix, Spermidine intracellular anatomical structure, L-Aspartic acid extracellular region	0.4967	0.8582	2	ARG2, DCOR	0.2395	0.6182	7	ADC, DCOR, CAT-2, ASCT2 (SLC1A5), PYCS, GlyT1, CAT-3		16
14	L-glutamate pathways and transport	131	0.004187	0.01962	0.004187	0.01962	7	L-Glutamic acid cytoplasmic vesicle, L-Tryptophan extracellular region, L-Glutamic acid extracellular region, L-Glutamic acid cytoplasm, L-Tryptophan intracellular anatomical structure, L-Glutamic acid mitochondrial matrix, L-Glutamic acid cytosol	0.5177	0.8582	2	PSAT, PPAT	0.6087	0.8797	5	GCL cat, NAD synthetase 1, ASCT2 (SLC1A5), PSAT, PYCS		14
15	(L)-valine pathways and transport	97	0.005058	0.06238	0.195	0.4432	3	AMP cytoplasm, ADP cytoplasm, Hypoxanthine intracellular anatomical structure	0.00846	0.6114	5	ACACA, AP-1, ACSL4, Acyl-CoA synthetase, TCF7L2 (TCF4)	0.005058	0.06238	10	Glycogen phosphorylase, 5'-NTD, ACACA, AP-1, ACSL4, PLC-beta, BCAT1, ASCT2 (SLC1A5), Acyl-CoA synthetase, ACSL3		18
16	Glutamic acid pathways and transport	141	0.006259	0.02762	0.006259	0.02762	7	L-Glutamic acid cytoplasmic vesicle, L-Tryptophan extracellular region, L-Glutamic acid extracellular region, L-Glutamic acid cytoplasm, L-Tryptophan intracellular anatomical structure, L-Glutamic acid mitochondrial matrix, L-Glutamic acid cytosol	0.8494	0.8907	1	PSAT	0.8243	0.9865	4	GCL cat, ASCT2 (SLC1A5), PSAT, PYCS		12
17	(S)-citrulline pathway	75	0.009645	0.1071	0.6981	0.9069	1	AMP cytoplasm	0.07481	0.6342	3	ARG2, DCOR, c-Myc	0.009645	0.1071	8	Glycogen phosphorylase, DCOR, ASSY, c-Myc, CAT-2, Caspase-3, SLC7A11, CAT-3		12
18	1-oleoyl-glycerol_3-phosphate pathway	127	0.0122	0.1137	0.8699	0.9069	1	Choline glycerophosphate intracellular anatomical structure	0.2324	0.7959	3	TIF1-beta, AP-1, Citron	0.0122	0.1137	11	Casein kinase II, alpha chains, CDC42, AP-1, ENPP2, Casein kinase II, alpha' chain (CSNK2A2), DIA1, NQO1, G-protein alpha-i family, G-protein alpha-i2, Casein kinase II, alpha chain (CSNK2A1), PRK1		15
19	1-linoleoyl-glycerol_3-phosphate pathway	94	0.0123	0.1137	0.7778	0.9069	1	Choline glycerophosphate intracellular anatomical structure	0.03415	0.6114	4	AHR, ACSL4, TCF7L2 (TCF4), Citron	0.0123	0.1137	9	Casein kinase II, alpha chains, ACSL4, ENPP2, Casein kinase II, alpha' chain (CSNK2A2), DIA1, G-protein alpha-i family, G-protein alpha-i2, Casein kinase II, alpha chain (CSNK2A1), PRK1		14
20	Phosphatidylcholine pathway	129	0.01362	0.1163	0.3308	0.6529	3	S-Adenosyl-L-methionine cytoplasm, Glutathione intracellular anatomical structure, S-Adenosyl-L-homocysteine cytoplasm	0.5093	0.8582	2	HSP70, CDK1 (p34)	0.01362	0.1163	11	Annexin VI, CNTN1 (F3), Fyn, gp130, SP-A, NCAM1, PLA2, HSP70, APLP2 active fragment, Ephrin-B receptors, APLP2 precursor		16
21	(L)-leucine pathways and transport	85	0.01962	0.1556	0.3878	0.7125	2	L-Glutamic acid cytoplasm, AMP cytoplasm	0.09998	0.6342	3	CLIP170, LIPIN1, AKT(PKB)	0.01962	0.1556	8	Casein kinase II, alpha chains, SGK1, LIPIN1, PP2A catalytic, CLIP170, BCAT1, BCKD-kinase, ASCT2 (SLC1A5)		13
22	1-hexadecanoyl-glycerol_3-phosphate pathway	87	0.02666	0.3598	0.399	0.7125	2	NAD('+) cytoplasm, Choline glycerophosphate intracellular anatomical structure	0.02666	0.6114	4	AHR, c-Myc, NDUFV1, TCF7L2 (TCF4)	0.05835	0.3598	7	Casein kinase II, alpha chains, ENPP2, Casein kinase II, alpha' chain (CSNK2A2), c-Myc, G-protein alpha-i family, G-protein alpha-i2, Casein kinase II, alpha chain (CSNK2A1)		13
23	Aminoacid metabolism_Beta-Alanine metabolism and transport	43	0.02934	0.1107	0.02934	0.1107	3	L-Aspartic acid cytosol, L-Aspartic acid cytoplasm, L-Aspartic acid extracellular region	0.4351	0.8582	1	DPYD	0.8289	0.9865	1	CSAD		5
24	Carbohydrate metabolism_Pyruvate metabolism and transport_new	75	0.02952	0.1107	0.02952	0.1107	4	Citric acid mitochondrial matrix, Citric acid cytosol, 2-Oxoglutaric acid cytosol, 2-Oxoglutaric acid mitochondrial matrix	0.6319	0.8582	1	AL1B1	0.3534	0.6768	4	SLC25A21, DLDH, PPCKM, SLC25A1		9
25	Vitamin, mediator and cofactor metabolism_CoA biosynthesis and transport	81	0.03769	0.1346	0.03769	0.1346	4	CTP cytoplasm, Vitamin B5 extracellular region, Vitamin B5 intracellular anatomical structure, 3'-Dephospho-CoA cytoplasm	0.08954	0.6342	3	PANK3, ACSL4, Acyl-CoA synthetase	0.223	0.6182	5	ACSL4, ENPP2, ASCT2 (SLC1A5), Acyl-CoA synthetase, ACSL3		12
26	Aminoacid metabolism_Tryptophan metabolism and transport	83	0.04067	0.1387	0.04067	0.1387	4	Indole-3-acetic acid intracellular anatomical structure, L-Tryptophan extracellular region, L-Tryptophan intracellular anatomical structure, Indoleacetaldehyde intracellular anatomical structure	0.6695	0.8582	1	AL1B1	0.9674	0.9865	1	ASCT2 (SLC1A5)		6
27	Maltohexaose pathways and transport	131	0.05401	0.162	0.05401	0.162	5	CTP cytoplasm, ADP extracellular region, ADP cytosol, GDP cytoplasm, ADP cytoplasm	0.2465	0.8024	3	TST, NDPK 7, HIRIP5	0.1532	0.5	8	SLC2A6, Glycogen phosphorylase, TRPM7, PP2A catalytic, PLC-beta, Glycogenin-1, Soluble calcium-activated nucleotidase 1, 14-3-3 zeta/delta		16
28	Maltopentaose pathways and transport	136	0.06155	0.171	0.06155	0.171	5	CTP cytoplasm, ADP extracellular region, ADP cytosol, GDP cytoplasm, ADP cytoplasm	0.2643	0.8024	3	TST, NDPK 7, HIRIP5	0.1771	0.5455	8	SLC2A6, Glycogen phosphorylase, TRPM7, PP2A catalytic, PLC-beta, Glycogenin-1, Soluble calcium-activated nucleotidase 1, 14-3-3 zeta/delta		16
29	(L)-tryptophan pathways and transport	163	0.06155	0.6342	0.4755	0.7278	3	L-Tryptophan extracellular region, L-Tryptophan intracellular anatomical structure, L-Aspartic acid cytoplasm	0.06155	0.6342	5	TyrRS, c-Myc, WARS, SerRS, APOC1	0.3283	0.6768	8	Casein kinase II, alpha chains, SGK1, WARS, MARS, SR-BI, c-Myc, ASCT2 (SLC1A5), SerRS		16
30	Aminoacid metabolism_Tryptophan, Phenylalanine, Methionine metabolism	146	0.07835	0.2099	0.07835	0.2099	5	3,4-Dihydroxyphenylglycol intracellular anatomical structure, Phenylpyruvic acid intracellular anatomical structure, L-Tryptophan extracellular region, L-Tryptophan intracellular anatomical structure, L-Phenylalanine cytoplasm	0.8593	0.8907	1	c-Myc	0.9375	0.9865	3	PP2A catalytic, SCOT, c-Myc		9
31	Lipid metabolism_Phospholipid metabolism	155	0.09539	0.2467	0.09539	0.2467	5	S-Adenosyl-L-methionine cytoplasm, Choline phosphate intracellular anatomical structure, Choline cytoplasm, L-Serine cytoplasm, Choline glycerophosphate intracellular anatomical structure	0.8756	0.8967	1	SERB	0.8758	0.9865	4	Cytosolic phospholipase A2 beta, DGK-iota, GDPD5, PTSS1		10
32	1-acyl-glycerol_3-phosphocholine pathway	88	0.1081	0.6342	0.7552	0.9069	1	Choline glycerophosphate intracellular anatomical structure	0.1081	0.6342	3	AHR, PAFAH alpha (LIS1), c-Myc	0.8744	0.9865	2	PAFAH alpha (LIS1), c-Myc		6
33	Glycine pathway	90	0.1137	0.5	0.763	0.9069	1	S-Adenosyl-L-homocysteine cytoplasm	0.1137	0.6342	3	KBL, c-Myc, GlyRS	0.1505	0.5	6	SHMT, Pitx1, MPP5, c-Myc, SHMT1, SHMT2		10
34	GalNAcbeta1-3Gal pathway	90	0.1137	0.6342	0.763	0.9069	1	D-Sucrose extracellular region	0.1137	0.6342	3	TST, VEGF-A, Galpha(q)-specific peptide GPCRs	0.4894	0.7873	4	VEGF-A, SP-A, BCAT1, G-protein alpha-i family		8
35	Aminoacid metabolism_Branched-chain amino acid metabolism	104	0.1219	0.4776	0.2237	0.4793	3	2-Oxoglutaric acid cytoplasm, 3-Hydroxyisobutyric acid intracellular anatomical structure, L-Glutamic acid cytoplasm	0.3985	0.8582	2	HMGCS1, AUMH	0.1219	0.4776	7	HMGCS2, HMGCS1, ODO1, SCOT, ACDSB, BCAT1, DLDH		12
36	Lysophosphatidic acid pathway	66	0.1232	0.4776	0.2781	0.5637	2	Choline extracellular region, 1-Palmitoyl-2-oleoyl-glycerol intracellular anatomical structure	0.5847	0.8582	1	c-Myc	0.1232	0.4776	5	DGK, ENPP2, c-Myc, G-protein alpha-i family, G-protein alpha-i2		8
37	O-hexanoyl-(L)-carnitine pathway	86	0.129	0.4776	0.3934	0.7125	2	2-Oxoglutaric acid cytoplasm, Butyrobetaine intracellular anatomical structure	0.6826	0.8582	1	ACSL4	0.129	0.4776	6	HDAC9, COX-1 (PTGS1), ACSL4, PLA2, NQO1, PTSS1		9
38	Vitamin, mediator and cofactor metabolism_Folic acid	55	0.1623	0.679	0.5837	0.8419	1	Folinic acid intracellular anatomical structure	0.1623	0.7665	2	TYSY, DHFR	0.3793	0.679	3	MTHFD2, SHMT1, SHMT2		6
39	Lauroylcarnitine pathway	89	0.1636	0.394	0.1636	0.394	3	2-Oxoglutaric acid cytoplasm, Butyrobetaine intracellular anatomical structure, L-Lauroylcarnitine intracellular anatomical structure	0.327	0.8417	2	ACACA, ACSL4	0.8784	0.9865	2	ACACA, ACSL4		7
40	Myristoyl-L-carnitine pathway	95	0.1795	0.5455	0.4428	0.7223	2	2-Oxoglutaric acid cytoplasm, Butyrobetaine intracellular anatomical structure	0.7188	0.8582	1	ACSL4	0.1795	0.5455	6	HDAC9, COX-1 (PTGS1), ACSL4, PLA2, NQO1, PTSS1		9
41	Glycine pathways and transport	114	0.1879	0.554	0.2659	0.554	3	L-Tryptophan extracellular region, L-Tryptophan intracellular anatomical structure, S-Adenosyl-L-homocysteine cytoplasm	0.1879	0.7959	3	KBL, c-Myc, GlyRS	0.3056	0.6768	6	SHMT, Pitx1, c-Myc, SHMT1, ASCT2 (SLC1A5), SHMT2		12
42	Stearoylcarnitine pathway	97	0.1917	0.5455	0.4535	0.7223	2	2-Oxoglutaric acid cytoplasm, Butyrobetaine intracellular anatomical structure	0.7263	0.8582	1	ACSL4	0.1917	0.5455	6	HDAC9, COX-1 (PTGS1), ACSL4, PLA2, NQO1, PTSS1		9
43	Pentose phosphate pathways and transport	122	0.2151	0.6768	0.8589	0.9069	1	D-Erythrose-4-phosphate intracellular anatomical structure	0.2151	0.7959	3	JunB, AP-1, FosB/JunB	0.3631	0.6768	6	SLC2A6, Beta-catenin, AP-1, JunD, G6PD, NFIC		10
44	2-arachidonoyl-glycerol_3-phosphocholine pathway	139	0.2751	0.6768	0.6483	0.9069	2	GDP cytoplasm, Choline glycerophosphate intracellular anatomical structure	0.2751	0.8063	3	AHR, c-Myc, PAR1	0.3217	0.6768	7	TGM2, PISD, NCC27, c-Myc, G-protein alpha-i family, ASCT2 (SLC1A5), Caspase-3		12
45	Sucrose pathway	90	0.2919	0.6768	0.4156	0.7223	2	D-Sucrose extracellular region, Raffinose intracellular anatomical structure	0.3319	0.8417	2	TST, UDP	0.2919	0.6768	5	Glycogen phosphorylase, SHPS-1, SP-A, UDP, TLR4		9
46	(L)-threonine pathways and transport	92	0.3077	0.6768	0.4266	0.7223	2	L-Tryptophan extracellular region, L-Tryptophan intracellular anatomical structure	0.7072	0.8582	1	SDSL	0.3077	0.6768	5	SGK1, SYTC, ASCT2 (SLC1A5), DLDH, SLC38A1		8
47	1-oleoyl-sn-glycero-3-phosphocholine pathway	121	0.3558	0.6768	0.8566	0.9069	1	Choline glycerophosphate intracellular anatomical structure	0.8022	0.88	1	c-Myc	0.3558	0.6768	6	Cytosolic phospholipase A2 beta, SP-A, PLA2, NCC27, c-Myc, ASCT2 (SLC1A5)		8
48	1-icosatrienoyl-sn-glycero-3-phosphocholine pathway	123	0.3704	0.6768	0.8612	0.9069	1	Choline glycerophosphate intracellular anatomical structure	0.8075	0.88	1	PAR1	0.3704	0.6768	6	Cytosolic phospholipase A2 beta, SP-A, PLA2, NCC27, G-protein alpha-i family, ASCT2 (SLC1A5)		8
49	Decanoylcarnitine pathway	84	0.3822	0.7125	0.3822	0.7125	2	2-Oxoglutaric acid cytoplasm, Butyrobetaine intracellular anatomical structure	0.6739	0.8582	1	ACACA	0.9687	0.9865	1	ACACA		4
50	1-docosahexaenoyl-glycerol_3-phosphocholine pathway	130	0.4212	0.7193	0.8761	0.9069	1	Choline glycerophosphate intracellular anatomical structure	0.5135	0.8582	2	TyrRS, PAR1	0.4212	0.7193	6	Cytosolic phospholipase A2 beta, SP-A, PLA2, NCC27, G-protein alpha-i family, ASCT2 (SLC1A5)		9

## Sheet: Comparison- ONC vs. TR WT
WT ONC201	WT TR57			Overlap	ONC201 WT Only	TR-57 WT Only
Aminoacid metabolism_Ala,Ser,Cys,Met,His,Pro,Gly,Glu,Gln metabolism and transport	(L)-proline pathways and transport			Aminoacid metabolism_Ala,Ser,Cys,Met,His,Pro,Gly,Glu,Gln metabolism and transport	(L)-valine pathways and transport	Sphingomyelin pathway					Overlap	42
Lipid metabolism_Glycosphingolipid metabolism	Sphingomyelin pathway			Lipid metabolism_Glycosphingolipid metabolism	1-acyl-glycerol_3-phosphocholine pathway	D-glucuronic acid pathway					ONC201 Only	8
Glutamic acid pathway	Glutamic acid pathway			Glutamic acid pathway	Glycine pathway	[O-hexadecanoyl-(L)-carnitine pathway					TR-57 Only	8
Steroid metabolism_Cholesterol biosynthesis	L-ornithine pathways and transport			Steroid metabolism_Cholesterol biosynthesis	Lauroylcarnitine pathway	Lipid metabolism_Triacylglycerol metabolism
Aminoacid metabolism_Asparagine, Aspartic acid metabolism and transport	Aminoacid metabolism_Ala,Ser,Cys,Met,His,Pro,Gly,Glu,Gln metabolism and transport			Aminoacid metabolism_Asparagine, Aspartic acid metabolism and transport	Pentose phosphate pathways and transport	Carbohydrate metabolism_Glycolisys, Glucogenesis and glucose transport
Aminoacid metabolism_Alanine,Glycine,Cysteine metabolism and transport	Lipid metabolism_Glycosphingolipid metabolism			Aminoacid metabolism_Alanine,Glycine,Cysteine metabolism and transport	1-oleoyl-sn-glycero-3-phosphocholine pathway	L-arginine pathways and transport
(L)-proline pathways and transport	Aminoacid metabolism_Arginine metabolism and transport			(L)-proline pathways and transport	1-icosatrienoyl-sn-glycero-3-phosphocholine pathway	Carbohydrate metabolism_Sucrose metabolism and transport
Aminoacid metabolism_Asparagine, Aspartic acid, Arginine metabolism and transport	(L)-leucine pathways and transport			Aminoacid metabolism_Asparagine, Aspartic acid, Arginine metabolism and transport	Decanoylcarnitine pathway	Acetyl-L-carnitine pathway
Aminoacid metabolism_Arginine metabolism and transport	Aminoacid metabolism_Asparagine, Aspartic acid, Arginine metabolism and transport			Aminoacid metabolism_Arginine metabolism and transport
L-serine pathways and transport	Aminoacid metabolism_Asparagine, Aspartic acid metabolism and transport			L-serine pathways and transport
Carbohydrate metabolism_TCA and tricarboxylic acid transport	Aminoacid metabolism_Alanine,Glycine,Cysteine metabolism and transport			Carbohydrate metabolism_TCA and tricarboxylic acid transport
Tyrosine pathway	Tyrosine pathway			Tyrosine pathway
L-ornithine pathways and transport	Steroid metabolism_Cholesterol biosynthesis			L-ornithine pathways and transport
L-glutamate pathways and transport	Carbohydrate metabolism_TCA and tricarboxylic acid transport			L-glutamate pathways and transport
(L)-valine pathways and transport	1-oleoyl-glycerol_3-phosphate pathway			Glutamic acid pathways and transport
Glutamic acid pathways and transport	L-glutamate pathways and transport			(S)-citrulline pathway
(S)-citrulline pathway	D-glucuronic acid pathway			1-oleoyl-glycerol_3-phosphate pathway
1-oleoyl-glycerol_3-phosphate pathway	Glutamic acid pathways and transport			1-linoleoyl-glycerol_3-phosphate pathway
1-linoleoyl-glycerol_3-phosphate pathway	Sucrose pathway			Phosphatidylcholine pathway
Phosphatidylcholine pathway	1-linoleoyl-glycerol_3-phosphate pathway			(L)-leucine pathways and transport
(L)-leucine pathways and transport	Phosphatidylcholine pathway			1-hexadecanoyl-glycerol_3-phosphate pathway
1-hexadecanoyl-glycerol_3-phosphate pathway	L-serine pathways and transport			Aminoacid metabolism_Beta-Alanine metabolism and transport
Aminoacid metabolism_Beta-Alanine metabolism and transport	(L)-tryptophan pathways and transport			Carbohydrate metabolism_Pyruvate metabolism and transport_new
Carbohydrate metabolism_Pyruvate metabolism and transport_new	Glycine pathways and transport			Vitamin, mediator and cofactor metabolism_CoA biosynthesis and transport
Vitamin, mediator and cofactor metabolism_CoA biosynthesis and transport	Aminoacid metabolism_Beta-Alanine metabolism and transport			Aminoacid metabolism_Tryptophan metabolism and transport
Aminoacid metabolism_Tryptophan metabolism and transport	Aminoacid metabolism_Tryptophan, Phenylalanine, Methionine metabolism			Maltohexaose pathways and transport
Maltohexaose pathways and transport	Carbohydrate metabolism_Pyruvate metabolism and transport_new			Maltopentaose pathways and transport
Maltopentaose pathways and transport	(S)-citrulline pathway			(L)-tryptophan pathways and transport
(L)-tryptophan pathways and transport	Aminoacid metabolism_Tryptophan metabolism and transport			Aminoacid metabolism_Tryptophan, Phenylalanine, Methionine metabolism
Aminoacid metabolism_Tryptophan, Phenylalanine, Methionine metabolism	1-hexadecanoyl-glycerol_3-phosphate pathway			Lipid metabolism_Phospholipid metabolism
Lipid metabolism_Phospholipid metabolism	Maltohexaose pathways and transport			GalNAcbeta1-3Gal pathway
1-acyl-glycerol_3-phosphocholine pathway	(L)-threonine pathways and transport			Aminoacid metabolism_Branched-chain amino acid metabolism
Glycine pathway	Maltopentaose pathways and transport			Lysophosphatidic acid pathway
GalNAcbeta1-3Gal pathway	[O-hexadecanoyl-(L)-carnitine pathway			O-hexanoyl-(L)-carnitine pathway
Aminoacid metabolism_Branched-chain amino acid metabolism	Lipid metabolism_Phospholipid metabolism			Vitamin, mediator and cofactor metabolism_Folic acid
Lysophosphatidic acid pathway	Vitamin, mediator and cofactor metabolism_CoA biosynthesis and transport			Myristoyl-L-carnitine pathway
O-hexanoyl-(L)-carnitine pathway	O-hexanoyl-(L)-carnitine pathway			Glycine pathways and transport
Vitamin, mediator and cofactor metabolism_Folic acid	Myristoyl-L-carnitine pathway			Stearoylcarnitine pathway
Lauroylcarnitine pathway	Stearoylcarnitine pathway			2-arachidonoyl-glycerol_3-phosphocholine pathway
Myristoyl-L-carnitine pathway	GalNAcbeta1-3Gal pathway			Sucrose pathway
Glycine pathways and transport	Aminoacid metabolism_Branched-chain amino acid metabolism			(L)-threonine pathways and transport
Stearoylcarnitine pathway	Lipid metabolism_Triacylglycerol metabolism			1-docosahexaenoyl-glycerol_3-phosphocholine pathway
Pentose phosphate pathways and transport	Lysophosphatidic acid pathway
2-arachidonoyl-glycerol_3-phosphocholine pathway	Vitamin, mediator and cofactor metabolism_Folic acid
Sucrose pathway	Carbohydrate metabolism_Glycolisys, Glucogenesis and glucose transport
(L)-threonine pathways and transport	2-arachidonoyl-glycerol_3-phosphocholine pathway
1-oleoyl-sn-glycero-3-phosphocholine pathway	L-arginine pathways and transport
1-icosatrienoyl-sn-glycero-3-phosphocholine pathway	1-docosahexaenoyl-glycerol_3-phosphocholine pathway
Decanoylcarnitine pathway	Carbohydrate metabolism_Sucrose metabolism and transport
1-docosahexaenoyl-glycerol_3-phosphocholine pathway	Acetyl-L-carnitine pathway

## Sheet: Comparisons- WT and KO
WT Overlap	ONC201 WT Only	TR-57 WT Only				KO ONC201	KO TR-57							WT ONC201 Only	WT TR-57 Only	WT ONC201 and TR-57	WT ONC201, WT TR-57, KO TR-57	WT TR-57 and KO TR-57	All 4	KO TR-57 only	WT ONC201 and KO _TR57
Aminoacid metabolism_Ala,Ser,Cys,Met,His,Pro,Gly,Glu,Gln metabolism and transport	(L)-valine pathways and transport	Sphingomyelin pathway				Lipid metabolism_Phospholipid metabolism	L-ornithine pathways and transport							1-acyl-glycerol_3-phosphocholine pathway	Sphingomyelin pathway	Aminoacid metabolism_Ala,Ser,Cys,Met,His,Pro,Gly,Glu,Gln metabolism and transport	(L)-proline pathways and transport	L-arginine pathways and transport	Lipid metabolism_Phospholipid metabolism	Vitamin, mediator and cofactor metabolism_Nitric oxide biosynthesis and transport	(L)-valine pathways and transport
Lipid metabolism_Glycosphingolipid metabolism	1-acyl-glycerol_3-phosphocholine pathway	D-glucuronic acid pathway					Aminoacid metabolism_Arginine metabolism and transport							Glycine pathway	D-glucuronic acid pathway	Lipid metabolism_Glycosphingolipid metabolism	Aminoacid metabolism_Asparagine, Aspartic acid, Arginine metabolism and transport	[O-hexadecanoyl-(L)-carnitine pathway		L-citrulline pathway	Decanoylcarnitine pathway
Glutamic acid pathway	Glycine pathway	[O-hexadecanoyl-(L)-carnitine pathway					(L)-proline pathways and transport							Pentose phosphate pathways and transport	Lipid metabolism_Triacylglycerol metabolism	Glutamic acid pathway	Aminoacid metabolism_Arginine metabolism and transport			(L)-lysine pathways and transport	Lauroylcarnitine pathway
Steroid metabolism_Cholesterol biosynthesis	Lauroylcarnitine pathway	Lipid metabolism_Triacylglycerol metabolism					Aminoacid metabolism_Asparagine, Aspartic acid, Arginine metabolism and transport							1-oleoyl-sn-glycero-3-phosphocholine pathway	Carbohydrate metabolism_Glycolisys, Glucogenesis and glucose transport	Steroid metabolism_Cholesterol biosynthesis	L-serine pathways and transport			(L)-carnitine pathway
Aminoacid metabolism_Asparagine, Aspartic acid metabolism and transport	Pentose phosphate pathways and transport	Carbohydrate metabolism_Glycolisys, Glucogenesis and glucose transport					(S)-citrulline pathway							1-icosatrienoyl-sn-glycero-3-phosphocholine pathway	Carbohydrate metabolism_Sucrose metabolism and transport	Aminoacid metabolism_Asparagine, Aspartic acid metabolism and transport	Carbohydrate metabolism_TCA and tricarboxylic acid transport			N-acetyl-beta-D-glucosaminyl-
Aminoacid metabolism_Alanine,Glycine,Cysteine metabolism and transport	1-oleoyl-sn-glycero-3-phosphocholine pathway	L-arginine pathways and transport					Vitamin, mediator and cofactor metabolism_Nitric oxide biosynthesis and transport								Acetyl-L-carnitine pathway	Aminoacid metabolism_Alanine,Glycine,Cysteine metabolism and transport	L-ornithine pathways and transport
(L)-proline pathways and transport	1-icosatrienoyl-sn-glycero-3-phosphocholine pathway	Carbohydrate metabolism_Sucrose metabolism and transport					L-citrulline pathway									Tyrosine pathway	(S)-citrulline pathway
Aminoacid metabolism_Asparagine, Aspartic acid, Arginine metabolism and transport	Decanoylcarnitine pathway	Acetyl-L-carnitine pathway					L-arginine pathways and transport									L-glutamate pathways and transport	1-oleoyl-glycerol_3-phosphate pathway
Aminoacid metabolism_Arginine metabolism and transport							(L)-valine pathways and transport									Glutamic acid pathways and transport	Phosphatidylcholine pathway
L-serine pathways and transport							(L)-lysine pathways and transport									1-linoleoyl-glycerol_3-phosphate pathway	Carbohydrate metabolism_Pyruvate metabolism and transport_new
Carbohydrate metabolism_TCA and tricarboxylic acid transport							L-serine pathways and transport									(L)-leucine pathways and transport	O-hexanoyl-(L)-carnitine pathway
Tyrosine pathway							Carbohydrate metabolism_TCA and tricarboxylic acid transport									1-hexadecanoyl-glycerol_3-phosphate pathway	Myristoyl-L-carnitine pathway
L-ornithine pathways and transport							[O-hexadecanoyl-(L)-carnitine pathway									Aminoacid metabolism_Beta-Alanine metabolism and transport	Stearoylcarnitine pathway
L-glutamate pathways and transport							Carbohydrate metabolism_Pyruvate metabolism and transport_new									Vitamin, mediator and cofactor metabolism_CoA biosynthesis and transport
Glutamic acid pathways and transport							Decanoylcarnitine pathway									Aminoacid metabolism_Tryptophan metabolism and transport
(S)-citrulline pathway							Lipid metabolism_Phospholipid metabolism									Maltohexaose pathways and transport
1-oleoyl-glycerol_3-phosphate pathway							O-hexanoyl-(L)-carnitine pathway									Maltopentaose pathways and transport
1-linoleoyl-glycerol_3-phosphate pathway							Lauroylcarnitine pathway									(L)-tryptophan pathways and transport
Phosphatidylcholine pathway							(L)-carnitine pathway									Aminoacid metabolism_Tryptophan, Phenylalanine, Methionine metabolism
(L)-leucine pathways and transport							N-acetyl-beta-D-glucosaminyl-									GalNAcbeta1-3Gal pathway
1-hexadecanoyl-glycerol_3-phosphate pathway							Myristoyl-L-carnitine pathway									Aminoacid metabolism_Branched-chain amino acid metabolism
Aminoacid metabolism_Beta-Alanine metabolism and transport							Stearoylcarnitine pathway									Lysophosphatidic acid pathway
Carbohydrate metabolism_Pyruvate metabolism and transport_new							1-oleoyl-glycerol_3-phosphate pathway									Vitamin, mediator and cofactor metabolism_Folic acid
Vitamin, mediator and cofactor metabolism_CoA biosynthesis and transport							Phosphatidylcholine pathway									Glycine pathways and transport
Aminoacid metabolism_Tryptophan metabolism and transport																2-arachidonoyl-glycerol_3-phosphocholine pathway
Maltohexaose pathways and transport																Sucrose pathway
Maltopentaose pathways and transport																(L)-threonine pathways and transport
(L)-tryptophan pathways and transport																1-docosahexaenoyl-glycerol_3-phosphocholine pathway
Aminoacid metabolism_Tryptophan, Phenylalanine, Methionine metabolism
Lipid metabolism_Phospholipid metabolism
GalNAcbeta1-3Gal pathway
Aminoacid metabolism_Branched-chain amino acid metabolism																		WT	KO
Lysophosphatidic acid pathway														Group	Number		ONC201	50	1
O-hexanoyl-(L)-carnitine pathway														A	5		TR57	50	24
Vitamin, mediator and cofactor metabolism_Folic acid														B	6
Myristoyl-L-carnitine pathway														C	0
Glycine pathways and transport														D	5
Stearoylcarnitine pathway														AB	28
2-arachidonoyl-glycerol_3-phosphocholine pathway														AC	0
Sucrose pathway														AD	3
(L)-threonine pathways and transport														BC	0
1-docosahexaenoyl-glycerol_3-phosphocholine pathway														BD	2
														CD	0
														ABC	0
														ABD	13
														ACD	0
														BCD	0
														ABCD	1

## Sheet: WT TR-57 vs. DMSO
Enrichment analysis report
Enrichment by Metabolic Networks (Endogenous)					WT_TR57_GeneGo.22Dec2022.xlsx				PR_ClpP_WT_TR57_Refined_pValue				TR_ClpP_WT_TR57_Refined_pValue
#	Networks	Total	min(pValue)	Min FDR	p-value	FDR	In Data	Network Objects from Active Data	p-value	FDR	In Data	Network Objects from Active Data	p-value	FDR	In Data	Network Objects from Active Data		total hits
1	(L)-proline pathways and transport	118	3.748e-06	0.0001537	3.748e-06	0.0001537	11	L-Proline extracellular region, L-Proline cytoplasm, L-Proline cytosol, L-Tryptophan extracellular region, L-Ornithine extracellular region, L-Ornithine cytosol, L-Glutamic acid cytoplasm, L-Tryptophan intracellular anatomical structure, L-Ornithine cytoplasm, L-Ornithine mitochondrial matrix, AMP cytoplasm	0.3364	0.8028	2	ARG2, TST	0.801	0.9562	3	PKC, SLC38A2, PLC-beta		16
2	Sphingomyelin pathway	97	6.769e-06	0.0003689	0.4949	0.7804	2	Choline phosphate intracellular anatomical structure, Choline cytoplasm	0.631	0.8028	1	HDAC3	6.769e-06	0.0003689	14	SPHK1, BGAL, Synaptotagmin, SHPS-1, SP-A, PLC-beta, Saposin C, PLC-beta3, PLC-gamma 1, TLR4, Calreticulin, PLC-gamma, Prosaposin, NSGPeroxidase		17
3	Glutamic acid pathway	103	7.468e-06	0.0002041	7.468e-06	0.0002041	10	2-Oxoglutaric acid cytoplasm, L-Glutamic acid cytoplasmic vesicle, L-Tryptophan extracellular region, gamma-L-Glutamyl-L-cysteine intracellular anatomical structure, L-Glutamic acid extracellular region, L-Glutamic acid cytoplasm, L-Tryptophan intracellular anatomical structure, L-Glutamic acid mitochondrial matrix, L-Glutamic acid cytosol, L-Ornithine mitochondrial matrix	0.6533	0.8028	1	PSAT	0.3072	0.6991	5	Ionotropic glutamate receptor, GRID2, GCL cat, PSAT, AATM		16
4	L-ornithine pathways and transport	126	4.448e-05	0.0008364	4.448e-05	0.0008364	10	2-Oxoglutaric acid cytoplasm, L-Aspartic acid cytosol, L-Ornithine extracellular region, L-Ornithine cytosol, L-Glutamic acid extracellular region, L-Glutamic acid cytoplasm, L-Ornithine cytoplasm, 2-Oxoglutaric acid mitochondrial matrix, L-Ornithine mitochondrial matrix, L-Aspartic acid extracellular region	0.7272	0.8089	1	ARG2	0.4714	0.8424	5	Ionotropic glutamate receptor, GRID2, ADC, DCOR, GlyT1		16
5	Aminoacid metabolism_Ala,Ser,Cys,Met,His,Pro,Gly,Glu,Gln metabolism and transport	190	7.14e-05	0.0008364	7.14e-05	0.0008364	12	2-Oxoglutaric acid cytoplasm, L-Proline extracellular region, L-Proline cytoplasm, S-Adenosyl-L-methionine cytoplasm, gamma-L-Glutamyl-L-cysteine intracellular anatomical structure, N-Methyl-glycine intracellular anatomical structure, L-Glutamic acid cytoplasm, Glutathione intracellular anatomical structure, L-Serine cytoplasm, L-Histidine cytoplasm, L-Serine extracellular region, Glutathione ext…	0.8609	0.8609	1	CTH	0.07624	0.3196	11	CBS, SLC38A2, GCL cat, GLSK, SHMT1, GLSL, GlyT1, MAT2A, SLC38A1, SHMT2, AATM		24
6	Lipid metabolism_Glycosphingolipid metabolism	190	7.14e-05	0.0008364	7.14e-05	0.0008364	12	2-Oxoglutaric acid cytoplasm, L-Proline extracellular region, L-Proline cytoplasm, S-Adenosyl-L-methionine cytoplasm, gamma-L-Glutamyl-L-cysteine intracellular anatomical structure, N-Methyl-glycine intracellular anatomical structure, L-Glutamic acid cytoplasm, Glutathione intracellular anatomical structure, L-Serine cytoplasm, L-Histidine cytoplasm, L-Serine extracellular region, Glutathione ext…	0.8609	0.8609	1	CTH	0.07624	0.3196	11	CBS, SLC38A2, GCL cat, GLSK, SHMT1, GLSL, GlyT1, MAT2A, SLC38A1, SHMT2, AATM		24
7	Aminoacid metabolism_Arginine metabolism and transport	110	8.691e-05	0.0008908	8.691e-05	0.0008908	9	2-Oxoglutaric acid cytoplasm, L-Aspartic acid cytosol, L-Ornithine cytosol, L-Glutamic acid cytoplasm, L-Ornithine cytoplasm, L-Glutamic acid mitochondrial matrix, L-Aspartic acid cytoplasm, 2-Oxoglutaric acid mitochondrial matrix, L-Aspartic acid extracellular region	0.3064	0.8028	2	ARG2, ASNS	0.5585	0.8707	4	ADC, ASNS, ASSY, CSAD		15
8	(L)-leucine pathways and transport	85	0.0001874	0.004084	0.4265	0.7747	2	L-Glutamic acid cytoplasm, AMP cytoplasm	0.01024	0.2224	4	CLIP170, 4E-BP1, LIPIN1, LeuRS	0.0001874	0.004084	11	Casein kinase II, alpha chains, SGK1, LIPIN1, PP2A catalytic, PKC, AKT(PKB), CLIP170, LARS1, p53, IGBP1, eEF1G		17
9	Aminoacid metabolism_Asparagine, Aspartic acid, Arginine metabolism and transport	76	0.000268	0.002442	0.000268	0.002442	7	2-Oxoglutaric acid cytoplasm, Adenylo-succinate intracellular anatomical structure, L-Glutamic acid cytoplasm, N-Carbamoylaspartate intracellular anatomical structure, L-Aspartic acid cytoplasm, 2-Oxoglutaric acid mitochondrial matrix, L-Aspartic acid extracellular region	0.5413	0.8028	1	ASNS	0.5149	0.8707	3	ASNS, ASSY, AATM		11
10	Aminoacid metabolism_Asparagine, Aspartic acid metabolism and transport	112	0.0005582	0.004577	0.0005582	0.004577	8	Adenylo-succinate intracellular anatomical structure, L-Glutamic acid extracellular region, L-Glutamic acid cytoplasm, N-Carbamoylaspartate intracellular anatomical structure, L-Glutamic acid mitochondrial matrix, L-Aspartic acid cytoplasm, L-Glutamic acid cytosol, L-Aspartic acid extracellular region	0.3139	0.8028	2	DPYD, ASNS	0.573	0.8707	4	ASNS, ASSY, CSAD, AATM		14
11	Aminoacid metabolism_Alanine,Glycine,Cysteine metabolism and transport	115	0.0006664	0.004775	0.0006664	0.004775	8	2-Oxoglutaric acid cytoplasm, S-Adenosyl-L-methionine cytoplasm, gamma-L-Glutamyl-L-cysteine intracellular anatomical structure, N-Methyl-glycine intracellular anatomical structure, Choline phosphate intracellular anatomical structure, Choline cytoplasm, L-Glutamic acid cytoplasm, Glutathione intracellular anatomical structure	0.0009478	0.06118	6	SERB, SERA, PSAT, KBL, ALAS1, CTH	0.02101	0.1432	9	CBS, SLC38A2, SERA, SHMT1, PSAT, GlyT1, MAT2A, SHMT2, AATM		23
12	Tyrosine pathway	90	0.0007569	0.004775	0.0007569	0.004775	7	L-Tryptophan extracellular region, L-Glutamic acid cytoplasm, L-Tryptophan intracellular anatomical structure, L-Ornithine cytoplasm, L-Phenylalanine cytoplasm, L-Aspartic acid cytoplasm, AMP cytoplasm	0.2309	0.8028	2	SERB, TyrRS	0.2183	0.643	5	Casein kinase II, alpha chains, TyrRS, SGK1, PKC, AATM		14
13	Steroid metabolism_Cholesterol biosynthesis	88	0.001051	0.01636	0.7822	0.8969	1	7-Dehydrocholesterol intracellular anatomical structure	0.05863	0.5016	3	HMGCS1, IDI1, FDFT1	0.001051	0.01636	10	CYP51A1, HMGCS2, HMGCS1, MVD, FDPS, ACAA1, EBP, LSS, MVK, IDI1		14
14	Carbohydrate metabolism_TCA and tricarboxylic acid transport	101	0.0015	0.008788	0.0015	0.008788	7	2-Oxoglutaric acid cytoplasm, Citric acid extracellular region, Citric acid mitochondrial matrix, cis-Aconitic acid intracellular anatomical structure, Citric acid cytosol, 2-Oxoglutaric acid cytosol, 2-Oxoglutaric acid mitochondrial matrix	0.646	0.8028	1	ACON	0.2931	0.6991	5	IDH1, SLC25A21, DLDH, PPCKM, SLC25A1		13
15	1-oleoyl-glycerol_3-phosphate pathway	127	0.001589	0.06118	0.8902	0.9182	1	Choline glycerophosphate intracellular anatomical structure	0.001589	0.06118	6	IRF2, Pitpnm (NIR2), SCD, CBP, Citron, NQO1	0.08316	0.3357	8	Casein kinase II, alpha chains, CDC42, ENPP2, Casein kinase II, alpha' chain (CSNK2A2), DIA1, NQO1, Casein kinase II, alpha chain (CSNK2A1), PRK1		15
16	L-glutamate pathways and transport	131	0.006479	0.03125	0.006479	0.03125	7	L-Glutamic acid cytoplasmic vesicle, L-Tryptophan extracellular region, L-Glutamic acid extracellular region, L-Glutamic acid cytoplasm, L-Tryptophan intracellular anatomical structure, L-Glutamic acid mitochondrial matrix, L-Glutamic acid cytosol	0.3844	0.8028	2	PSAT, PPAT	0.696	0.9477	4	Ionotropic glutamate receptor, GRID2, GCL cat, PSAT		13
17	D-glucuronic acid pathway	77	0.009527	0.04135	0.009527	0.04135	5	2-Oxoglutaric acid cytoplasm, Citric acid cytoplasm, L-Glutamic acid cytoplasmic vesicle, L-Glutamic acid cytoplasm, L-Glutamic acid cytosol	0.546	0.8028	1	p73	0.2958	0.6991	4	BAD, HMG14, AKR1C4, NCOA3 (pCIP/SRC3)		10
18	Glutamic acid pathways and transport	141	0.009581	0.04135	0.009581	0.04135	7	L-Glutamic acid cytoplasmic vesicle, L-Tryptophan extracellular region, L-Glutamic acid extracellular region, L-Glutamic acid cytoplasm, L-Tryptophan intracellular anatomical structure, L-Glutamic acid mitochondrial matrix, L-Glutamic acid cytosol	0.7669	0.8089	1	PSAT	0.7498	0.9562	4	Ionotropic glutamate receptor, GRID2, GCL cat, PSAT		12
19	Sucrose pathway	90	0.01443	0.1311	0.4556	0.7783	2	D-Sucrose extracellular region, Raffinose intracellular anatomical structure	0.6032	0.8028	1	TST	0.01443	0.1311	8	Glycogen phosphorylase, SHPS-1, SP-A, UDP, p53, TLR4, Calreticulin, AATM		11
20	1-linoleoyl-glycerol_3-phosphate pathway	94	0.01444	0.2224	0.8039	0.8969	1	Choline glycerophosphate intracellular anatomical structure	0.01444	0.2224	4	AHR, IRF2, Pitpnm (NIR2), Citron	0.04984	0.2615	7	Casein kinase II, alpha chains, ENPP2, PDK (PDPK1), Casein kinase II, alpha' chain (CSNK2A2), DIA1, Casein kinase II, alpha chain (CSNK2A1), PRK1		12
21	Phosphatidylcholine pathway	129	0.01632	0.1368	0.6505	0.8858	2	S-Adenosyl-L-methionine cytoplasm, Glutathione intracellular anatomical structure	0.7356	0.8089	1	CDK1 (p34)	0.01632	0.1368	10	Annexin VI, Fyn, gp130, SP-A, Ephrin-B receptor 4, PKC, PLA2, HSP70, PKC-delta, Ephrin-B receptors		13
22	L-serine pathways and transport	134	0.02078	0.1432	0.0767	0.2329	5	L-Tryptophan extracellular region, L-Tryptophan intracellular anatomical structure, L-Serine cytoplasm, L-Serine extracellular region, L-Aspartic acid extracellular region	0.1529	0.8028	3	SERB, SerRS, c-Myc	0.02078	0.1432	10	SGK1, SHMT, CBS, SLC38A2, SHMT1, SerRS, GlyT1, SPT1, SLC38A1, SHMT2		18
23	(L)-tryptophan pathways and transport	163	0.02337	0.2571	0.5288	0.8171	3	L-Tryptophan extracellular region, L-Tryptophan intracellular anatomical structure, L-Aspartic acid cytoplasm	0.02337	0.2571	5	WARS, TyrRS, SerRS, LeuRS, c-Myc	0.06529	0.2965	10	Casein kinase II, alpha chains, TyrRS, SGK1, WARS, MARS, PKC, LARS1, KARS, YY1, SerRS		18
24	Glycine pathways and transport	114	0.0273	0.2627	0.5827	0.8382	2	L-Tryptophan extracellular region, L-Tryptophan intracellular anatomical structure	0.0273	0.2627	4	GlyRS, KBL, ALAS1, c-Myc	0.386	0.765	5	SHMT, SLC38A2, SHMT1, SHMT2, AATM		11
25	Aminoacid metabolism_Beta-Alanine metabolism and transport	43	0.03591	0.1296	0.03591	0.1296	3	L-Aspartic acid cytosol, L-Aspartic acid cytoplasm, L-Aspartic acid extracellular region	0.3555	0.8028	1	DPYD	0.7924	0.9562	1	CSAD		5
26	Aminoacid metabolism_Tryptophan, Phenylalanine, Methionine metabolism	146	0.03691	0.1296	0.03691	0.1296	6	Phenylpyruvic acid intracellular anatomical structure, L-Tryptophan extracellular region, Epinephrine intracellular anatomical structure, L-Tryptophan intracellular anatomical structure, L-Phenylalanine cytoplasm, Vanylglycol intracellular anatomical structure	0.7788	0.8104	1	c-Myc	0.9005	0.9729	3	PP2A catalytic, SCOT, AATM		10
27	Carbohydrate metabolism_Pyruvate metabolism and transport_new	75	0.03793	0.1296	0.03793	0.1296	4	Citric acid mitochondrial matrix, Citric acid cytosol, 2-Oxoglutaric acid cytosol, 2-Oxoglutaric acid mitochondrial matrix	0.5365	0.8028	1	AL1B1	0.2796	0.6991	4	SLC25A21, DLDH, PPCKM, SLC25A1		9
28	(S)-citrulline pathway	75	0.05037	0.2615	0.3661	0.6981	2	L-Ornithine cytoplasm, AMP cytoplasm	0.1753	0.8028	2	ARG2, c-Myc	0.05037	0.2615	6	CLN3, Glycogen phosphorylase, DCOR, ASSY, Caspase-3, SLC7A11		10
29	Aminoacid metabolism_Tryptophan metabolism and transport	83	0.05186	0.1635	0.05186	0.1635	4	Indole-3-acetic acid intracellular anatomical structure, L-Tryptophan extracellular region, L-Tryptophan intracellular anatomical structure, Indoleacetaldehyde intracellular anatomical structure	0.5733	0.8028	1	AL1B1	0.9525	0.9729	1	SLC38A2		6
30	1-hexadecanoyl-glycerol_3-phosphate pathway	87	0.08964	0.3383	0.7783	0.8969	1	Choline glycerophosphate intracellular anatomical structure	0.2196	0.8028	2	AHR, c-Myc	0.08964	0.3383	6	Casein kinase II, alpha chains, ENPP2, ACAA1, p53, Casein kinase II, alpha' chain (CSNK2A2), Casein kinase II, alpha chain (CSNK2A1)		9
31	Maltohexaose pathways and transport	131	0.09544	0.3468	0.6589	0.8858	2	GTP cytoplasm, GDP cytoplasm	0.1457	0.8028	3	TST, NDPK 7, HIRIP5	0.09544	0.3468	8	SLC2A6, Glycogen phosphorylase, TRPM7, GLUT1, PP2A catalytic, PLC-beta, Glycogenin-1, Soluble calcium-activated nucleotidase 1		13
32	(L)-threonine pathways and transport	92	0.1098	0.3705	0.467	0.7804	2	L-Tryptophan extracellular region, L-Tryptophan intracellular anatomical structure	0.6113	0.8028	1	SDSL	0.1098	0.3705	6	BCKD-E1beta, SGK1, SYTC, SLC38A2, DLDH, SLC38A1		9
33	Maltopentaose pathways and transport	136	0.1122	0.3705	0.6791	0.8969	2	GTP cytoplasm, GDP cytoplasm	0.1577	0.8028	3	TST, NDPK 7, HIRIP5	0.1122	0.3705	8	SLC2A6, Glycogen phosphorylase, TRPM7, GLUT1, PP2A catalytic, PLC-beta, Glycogenin-1, Soluble calcium-activated nucleotidase 1		13
34	[O-hexadecanoyl-(L)-carnitine pathway	71	0.1193	0.3352	0.1193	0.3352	3	L-Carnitine cytoplasm, L-Carnitine mitochondrial matrix, Choline glycerophosphate intracellular anatomical structure	0.5169	0.8028	1	LBC	0.926	0.9729	1	PLC-beta3		5
35	Lipid metabolism_Phospholipid metabolism	155	0.1226	0.3352	0.1226	0.3352	5	S-Adenosyl-L-methionine cytoplasm, Choline phosphate intracellular anatomical structure, Choline cytoplasm, L-Serine cytoplasm, Choline glycerophosphate intracellular anatomical structure	0.4688	0.8028	2	SERB, EKI1	0.8126	0.9562	4	PEMT, DGK-iota, GDPD5, LPP1		11
36	Vitamin, mediator and cofactor metabolism_CoA biosynthesis and transport	81	0.1585	0.4192	0.1585	0.4192	3	Vitamin B5 extracellular region, Vitamin B5 intracellular anatomical structure, 3'-Dephospho-CoA cytoplasm	0.5644	0.8028	1	PANK3	0.5584	0.8707	3	ENPP2, Acyl-CoA synthetase, ACSL3		7
37	O-hexanoyl-(L)-carnitine pathway	86	0.1794	0.4597	0.1794	0.4597	3	2-Oxoglutaric acid cytoplasm, L-Carnitine cytoplasm, Butyrobetaine intracellular anatomical structure	0.2159	0.8028	2	CBP, NQO1	0.1927	0.6001	5	HDAC9, COX-1 (PTGS1), ACAA1, PLA2, NQO1		10
38	Myristoyl-L-carnitine pathway	95	0.2187	0.5436	0.2187	0.5436	3	2-Oxoglutaric acid cytoplasm, L-Carnitine cytoplasm, Butyrobetaine intracellular anatomical structure	0.2497	0.8028	2	CBP, NQO1	0.2516	0.6991	5	HDAC9, COX-1 (PTGS1), ACAA1, PLA2, NQO1		10
39	Stearoylcarnitine pathway	97	0.2277	0.5492	0.2277	0.5492	3	2-Oxoglutaric acid cytoplasm, L-Carnitine cytoplasm, Butyrobetaine intracellular anatomical structure	0.2573	0.8028	2	CBP, NQO1	0.2652	0.6991	5	HDAC9, COX-1 (PTGS1), ACAA1, PLA2, NQO1		10
40	GalNAcbeta1-3Gal pathway	90	0.2309	0.7695	0.7896	0.8969	1	D-Sucrose extracellular region	0.2309	0.8028	2	TST, LeuRS	0.4024	0.7695	4	VEGF-A, SP-A, LARS1, LDLR		7
41	Aminoacid metabolism_Branched-chain amino acid metabolism	104	0.2597	0.5756	0.2597	0.5756	3	2-Oxoglutaric acid cytoplasm, 3-Hydroxyisobutyric acid intracellular anatomical structure, L-Glutamic acid cytoplasm	0.6569	0.8028	1	HMGCS1	0.3143	0.6991	5	BCKD-E1beta, HMGCS2, HMGCS1, SCOT, DLDH		9
42	Lipid metabolism_Triacylglycerol metabolism	99	0.2791	0.6991	0.8203	0.8969	1	D-Glyceraldehyde 3-phosphate intracellular anatomical structure	0.6386	0.8028	1	AL1B1	0.2791	0.6991	5	TPI1, AKR1C1, AKR1C4, DGK-iota, ACSL3		7
43	Lysophosphatidic acid pathway	66	0.3099	0.6221	0.3099	0.6221	2	Choline extracellular region, 1-Palmitoyl-2-oleoyl-glycerol intracellular anatomical structure	0.4913	0.8028	1	c-Myc	0.6901	0.9477	2	DGK, ENPP2		5
44	Vitamin, mediator and cofactor metabolism_Folic acid	55	0.3137	0.6991	0.6129	0.8617	1	Folinic acid intracellular anatomical structure	0.4303	0.8028	1	TYSY	0.3137	0.6991	3	MTHFD2, SHMT1, SHMT2		5
45	Carbohydrate metabolism_Glycolisys, Glucogenesis and glucose transport	134	0.4	0.7455	0.4	0.7455	3	D-Mannose extracellular region, D-Glyceraldehyde 3-phosphate intracellular anatomical structure, D-Mannose intracellular anatomical structure	0.7491	0.8089	1	ENO2	0.865	0.9729	3	SLC2A6, TPI1, GLUT1		7
46	2-arachidonoyl-glycerol_3-phosphocholine pathway	139	0.4132	0.8028	0.6908	0.8969	2	GDP cytoplasm, Choline glycerophosphate intracellular anatomical structure	0.4132	0.8028	2	AHR, c-Myc	0.5594	0.8707	5	TGM2, CPOX, p53, PISD, Caspase-3		9
47	L-arginine pathways and transport	70	0.4599	0.8028	0.7018	0.8969	1	L-Ornithine cytoplasm	0.5119	0.8028	1	ARG2	0.4599	0.8354	3	PP2A catalytic, PKC, ADC		5
48	1-docosahexaenoyl-glycerol_3-phosphocholine pathway	130	0.4992	0.8089	0.8958	0.9182	1	Choline glycerophosphate intracellular anatomical structure	0.7384	0.8089	1	TyrRS	0.4992	0.8707	5	TyrRS, SP-A, CPOX, PLA2, Calreticulin		7
49	Carbohydrate metabolism_Sucrose metabolism and transport	109	0.5512	0.8089	0.558	0.8171	2	D-Sucrose extracellular region, Raffinose intracellular anatomical structure	0.6743	0.8089	1	TST	0.5512	0.8707	4	BGAL, SLC2A6, Glycogen phosphorylase, GLUT1		7
50	Acetyl-L-carnitine pathway	99	0.6386	0.8028	0.8203	0.8969	1	L-Carnitine cytoplasm	0.6386	0.8028	1	c-Myc	0.9738	0.9738	1	SP-A2		3

## Sheet: KO ONC201 vs. DMSO (T,M)
Enrichment analysis report
Enrichment by Metabolic Networks (Endogenous)					KO_ONC201_GeneGo.22Dec2022				TR_ClpP_KO_ONC201_Refined_pValue
#	Networks	Total	min(pValue)	Min FDR	p-value	FDR	In Data	Network Objects from Active Data	p-value	FDR	In Data	Network Objects from Active Data
1	Lipid metabolism_Phospholipid metabolism	155	0.2116	0.2116	0.2646	0.5171	2	Choline glycerophosphate intracellular anatomical structure, Choline phosphate intracellular anatomical structure	0.2116	0.2116	1	DGK-theta
2
3
4
5
6
7
8
9
10
11
12
13
14
15
16
17
18
19
20
21
22
23
24
25
26
27
28
29
30
31
32
33
34
35
36
37
38
39
40
41
42
43
44
45
46
47
48
49
50

## Sheet: KO TR-57 vs. DMSO (T,M)
Enrichment analysis report
Enrichment by Metabolic Networks (Endogenous)					KO_TR57_GeneGo.22Dec2022				TR_ClpP_KO_TR57_Refined_pValue
#	Networks	Total	min(pValue)	Min FDR	p-value	FDR	In Data	Network Objects from Active Data	p-value	FDR	In Data	Network Objects from Active Data		total
1	L-ornithine pathways and transport	126	2.688e-07	1.64e-05	2.688e-07	1.64e-05	10	2-Oxoglutaric acid cytoplasm, L-Aspartic acid cytosol, L-Ornithine extracellular region, L-Ornithine cytosol, L-Glutamic acid extracellular region, L-Glutamic acid cytoplasm, L-Ornithine cytoplasm, 2-Oxoglutaric acid mitochondrial matrix, L-Ornithine mitochondrial matrix, L-Aspartic acid extracellular region	0.003584	0.06451	3	CAT-3, DCOR, CAT-2		13
2	Aminoacid metabolism_Arginine metabolism and transport	110	8.934e-07	2.725e-05	8.934e-07	2.725e-05	9	2-Oxoglutaric acid cytoplasm, L-Aspartic acid cytosol, L-Ornithine cytosol, L-Glutamic acid cytoplasm, L-Ornithine cytoplasm, L-Glutamic acid mitochondrial matrix, L-Aspartic acid cytoplasm, 2-Oxoglutaric acid mitochondrial matrix, L-Aspartic acid extracellular region	0.03142	0.1244	2	CAT-3, CAT-2		11
3	(L)-proline pathways and transport	118	1.592e-05	0.0002427	1.592e-05	0.0002427	8	L-Proline extracellular region, L-Proline cytoplasm, L-Proline cytosol, L-Ornithine extracellular region, L-Ornithine cytosol, L-Glutamic acid cytoplasm, L-Ornithine cytoplasm, L-Ornithine mitochondrial matrix	0.03576	0.1244	2	CAT-3, CAT-2		10
4	Aminoacid metabolism_Asparagine, Aspartic acid, Arginine metabolism and transport	76	8.757e-05	0.0006972	8.757e-05	0.0006972	6	2-Oxoglutaric acid cytoplasm, L-Glutamic acid cytoplasm, N-Carbamoylaspartate intracellular anatomical structure, L-Aspartic acid cytoplasm, 2-Oxoglutaric acid mitochondrial matrix, L-Aspartic acid extracellular region	0.01568	0.1129	2	CAT-3, CAT-2		8
5	(S)-citrulline pathway	75	0.0008012	0.02884	0.5288	0.7756	1	L-Ornithine cytoplasm	0.0008012	0.02884	3	CAT-3, DCOR, CAT-2		4
6	Vitamin, mediator and cofactor metabolism_Nitric oxide biosynthesis and transport	51	0.001498	0.005864	0.001498	0.005864	4	L-Ornithine extracellular region, L-Ornithine cytosol, L-Ornithine cytoplasm, L-Ornithine mitochondrial matrix	0.007272	0.08726	2	CAT-3, CAT-2		6
7	L-citrulline pathway	87	0.001538	0.005864	0.001538	0.005864	5	L-Ornithine cytosol, L-Glutamic acid extracellular region, L-Glutamic acid cytoplasm, L-Ornithine cytoplasm, Glutathione intracellular anatomical structure	0.2032	0.2611	1	CAT-2		6
8	L-arginine pathways and transport	70	0.0134	0.1129	0.5044	0.7756	1	L-Ornithine cytoplasm	0.0134	0.1129	2	CAT-3, CAT-2		3
9	(L)-valine pathways and transport	97	0.01492	0.0455	0.01492	0.0455	4	Adenosine cytoplasm, IMP intracellular anatomical structure, Adenosine lysosome, Hypoxanthine intracellular anatomical structure	0.224	0.2611	1	AP-1		5
10	(L)-lysine pathways and transport	107	0.02985	0.1244	0.08851	0.2347	3	2-Oxoglutaric acid cytoplasm, L-Aspartic acid cytosol, L-Aspartic acid extracellular region	0.02985	0.1244	2	CAT-3, CAT-2		5
11	L-serine pathways and transport	134	0.04512	0.1354	0.146	0.3562	3	L-Cysteine intracellular anatomical structure, L-Cysteine extracellular region, L-Aspartic acid extracellular region	0.04512	0.1354	2	CAT-3, CAT-2		5
12	Carbohydrate metabolism_TCA and tricarboxylic acid transport	101	0.07737	0.2145	0.07737	0.2145	3	2-Oxoglutaric acid cytoplasm, 2-Oxoglutaric acid cytosol, 2-Oxoglutaric acid mitochondrial matrix	0.2321	0.2611	1	SLC25A21		4
13	[O-hexadecanoyl-(L)-carnitine pathway	71	0.1689	0.2611	0.5094	0.7756	1	Choline glycerophosphate intracellular anatomical structure	0.1689	0.2611	1	CPT-1B		2
14	Carbohydrate metabolism_Pyruvate metabolism and transport_new	75	0.1695	0.2611	0.1695	0.3948	2	2-Oxoglutaric acid cytosol, 2-Oxoglutaric acid mitochondrial matrix	0.1776	0.2611	1	SLC25A21		3
15	Decanoylcarnitine pathway	84	0.1969	0.2611	0.2018	0.4103	2	2-Oxoglutaric acid cytoplasm, L-Decanoylcarnitine intracellular anatomical structure	0.1969	0.2611	1	CPT-1B		3
16	Lipid metabolism_Phospholipid metabolism	155	0.1973	0.3349	0.1973	0.4103	3	S-Adenosyl-L-methionine cytoplasm, Choline phosphate intracellular anatomical structure, Choline glycerophosphate intracellular anatomical structure	0.3349	0.3349	1	DGK-theta		4
17	O-hexanoyl-(L)-carnitine pathway	86	0.2011	0.2611	0.5785	0.7756	1	2-Oxoglutaric acid cytoplasm	0.2011	0.2611	1	CPT-1B		2
18	Lauroylcarnitine pathway	89	0.2074	0.2611	0.5911	0.7756	1	2-Oxoglutaric acid cytoplasm	0.2074	0.2611	1	CPT-1B		2
19	(L)-carnitine pathway	90	0.2095	0.2611	0.5952	0.7756	1	L-Decanoylcarnitine intracellular anatomical structure	0.2095	0.2611	1	CPT-1B		2
20	N-acetyl-beta-D-glucosaminyl-	92	0.2136	0.2611	0.231	0.4404	2	N-Acetyl-D-glucosamine extracellular region, N-Acetyl-D-glucosamine intracellular anatomical structure	0.2136	0.2611	1	ENDO180		3
21	Myristoyl-L-carnitine pathway	95	0.2198	0.2611	0.6153	0.7756	1	2-Oxoglutaric acid cytoplasm	0.2198	0.2611	1	CPT-1B		2
22	Stearoylcarnitine pathway	97	0.224	0.2611	0.623	0.7756	1	2-Oxoglutaric acid cytoplasm	0.224	0.2611	1	CPT-1B		2
23	1-oleoyl-glycerol_3-phosphate pathway	127	0.2833	0.2953	0.7224	0.7827	1	Choline glycerophosphate intracellular anatomical structure	0.2833	0.2953	1	AP-1		2
24	Phosphatidylcholine pathway	129	0.2871	0.2953	0.367	0.6537	2	S-Adenosyl-L-methionine cytoplasm, Glutathione intracellular anatomical structure	0.2871	0.2953	1	p120GAP		3
25
26
27
28
29
30
31
32
33
34
35
36
37
38
39
40
41
42
43
44
45
46
47
48
49
50
